# Supplementary material for: Photocatalytic Deposition of Au Nanoparticles on Ti3C2Tx MXene Substrates for Surface-Enhanced Raman Scattering
Source: MDPI journal article supplement (doi:10.3390/molecules29102383), 2024-05-18
Supplement: s1 [file s1]

## **SUPPORTING INFORMATION**

### **Photocatalytic deposition of Au nanoparticles on $\text{Ti}_3\text{C}_2\text{T}_x$ MXene substrates for surface-enhanced Raman scattering**

Zhi Yang<sup>1</sup>, Lu Yang<sup>1</sup>, Yucun, Liu<sup>1,\*</sup> and Lei Chen<sup>1,2,\*</sup>

1 College of Chemistry, Jilin Normal University, Siping 136000, China; yangzhi12260102@163.com (Z.Y.); yanglu4818@163.com (L.Y.)

2 School of Materials Science and Engineering, Jilin Jianzhu University, Changchun 130118, China

\* Correspondence: liuyc19873@163.com (Y.L.); chenlei82@jlju.edu.cn (L.C.)

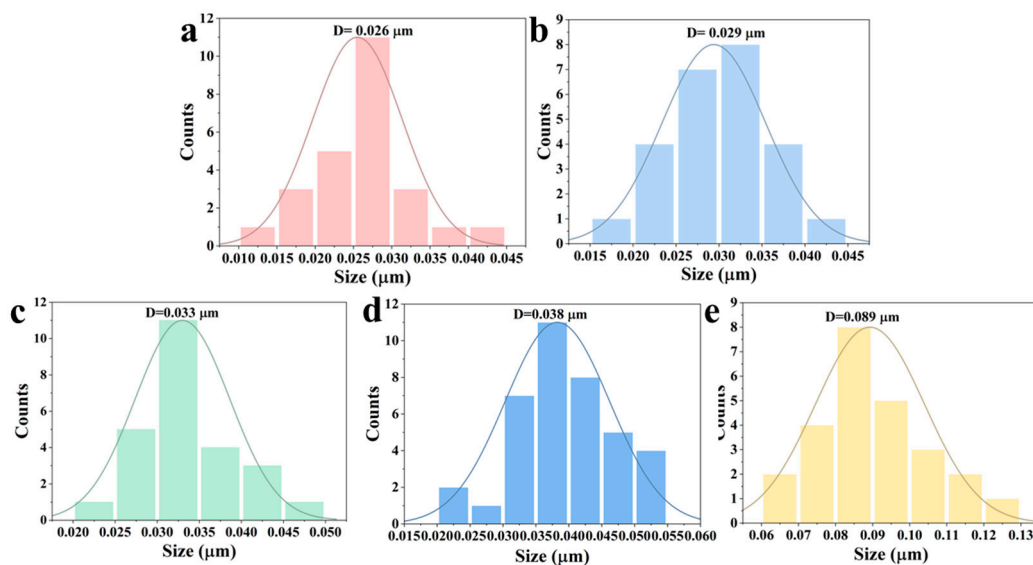

**Figure S1.** The size distribution of Au NPs absorbed on the surface of MXene nanosheets at different photoreaction time (10, 20, 30, 40, and 50 min).

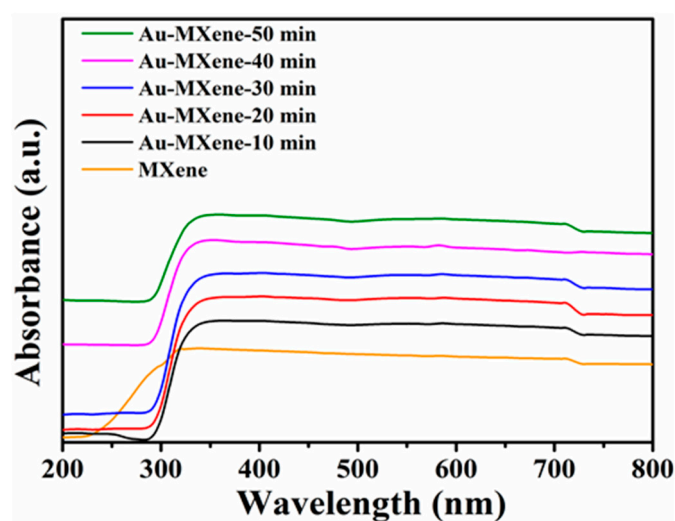

**Figure S2.** UV-Vis absorption spectra of MXene and Au-MXene composites (10, 20, 30, 40, and 50 min)

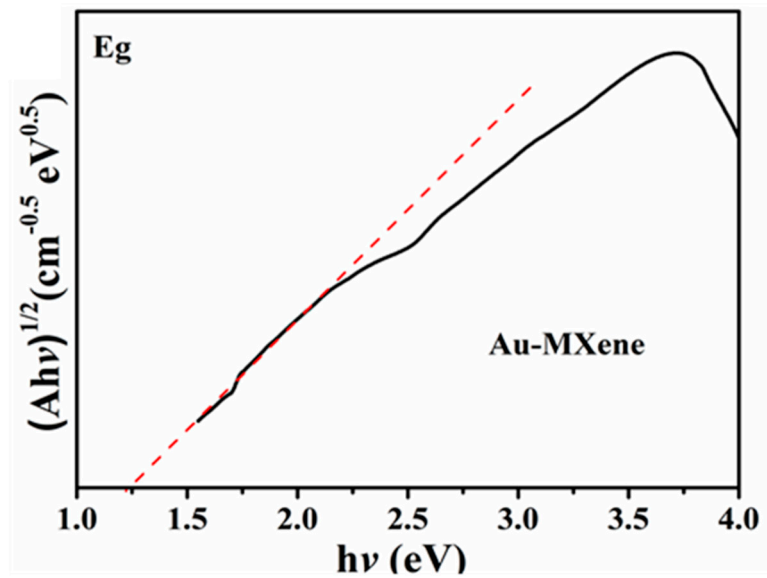

**Figure S3.** The plot of  $(Ah\nu)^{1/2}$  versus photon energy ( $h\nu$ ).

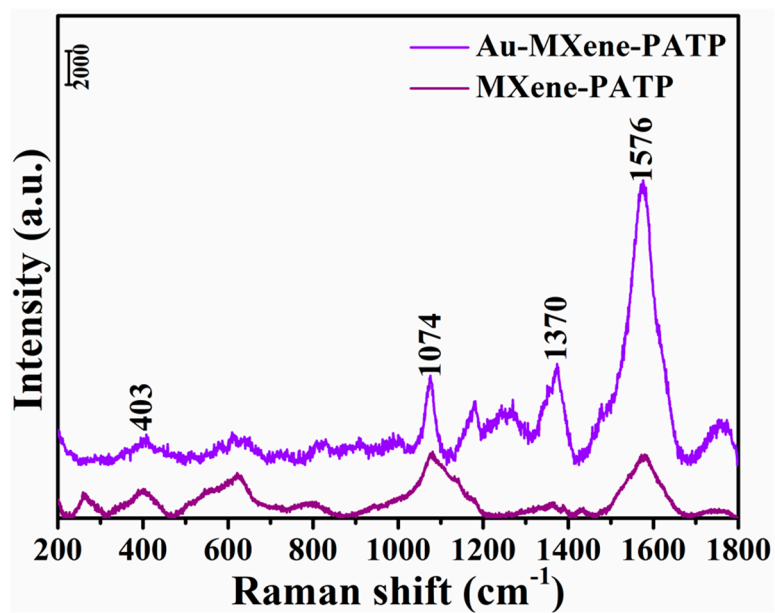

**Figure S4.** SERS spectra of PATP adsorbed on the MXene and Au-MXene composite.

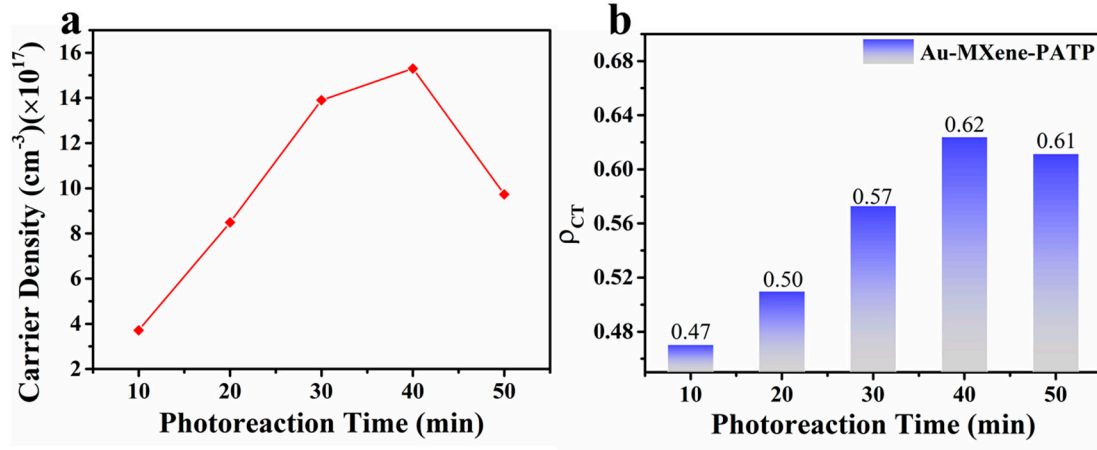

**Figure S5.** The photoreaction time of Au-MXene composites depends on the relationship between (a) carrier concentration and (b) charge transfer degree.

**Table S1.** Wavenumber and band assignments of the SERS spectra of the Au-MXene-PATP system based on 633 nm laser excitation<sup>[1]</sup>.

| Wavenumber ( $\text{cm}^{-1}$ ) | Assignment                        |
|---------------------------------|-----------------------------------|
| 403                             | O-H bending (MXene)               |
| 1074                            | C-S stretching (a1)               |
| 1180                            | C-H bending (b2)                  |
| 1370                            | C-H bending + C-C stretching (b2) |
| 1576                            | C-C stretching (a1)               |

The enhancement factor (EF) was calculated as follow:

$$\text{EF} = (I_{\text{SERS}}/N_{\text{SERS}}) / (I_{\text{bulk}}/N_{\text{bulk}}) \quad (3)$$

Where  $I_{\text{SERS}}$  is the SERS signal intensity and  $I_{\text{bulk}}$  is the reference Raman signal intensity.  $N_{\text{SERS}}$  and  $N_{\text{bulk}}$  denote the number of molecules of the corresponding probe under laser irradiation, respectively.

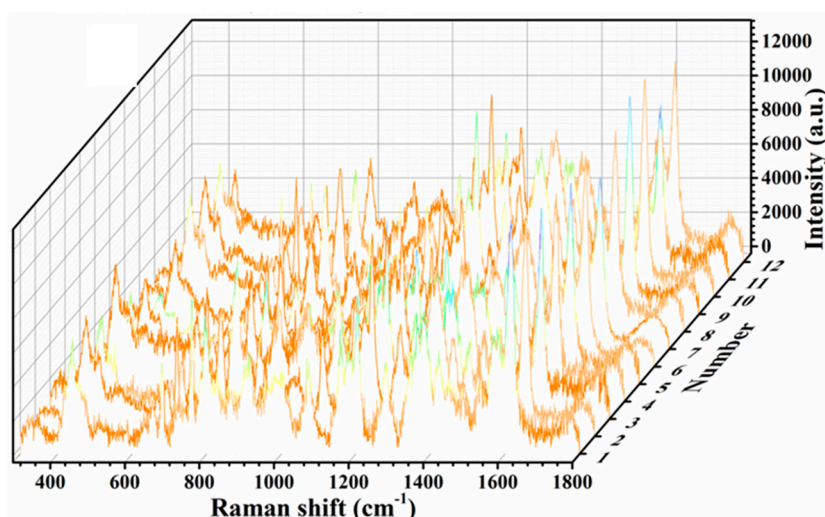

**Figure S6.** SERS spectra CBZ acquired from 12 randomly selected spots on the Au-MXene substrates ( $10^{-5}$  mol/L).

**Table S2.** Band assignment of carbendazim<sup>[2]</sup>.

| Solid Raman | SERS | Vibrational Description           |
|-------------|------|-----------------------------------|
| 655         | 680  | Ring stretching and C–C bending   |
| 780         | 798  | C–O–CH <sub>3</sub> bending       |
| 922         | 916  | C–H bending                       |
| 1021        | 1071 | C–N bending                       |
| 1228        | 1202 | C–C bending and N–H bending       |
| 1274        | 1278 | C–H stretching                    |
| 1392        | 1380 | C–N stretching                    |
| 1618        | 1613 | C=C stretching and C–C stretching |

## References

1. Ji, R.; Sun, W.D.; Chu, Y. One-step hydrothermal synthesis of Ag/Cu<sub>2</sub>O heterogeneous nanostructures over Cu foil and their SERS applications. *RSC Adv.* 2014; 4, 6055–6059.
2. Furini, L.N.; Sanchez-Cortes, S.; Lopez-Tocon, I.; Otero, J.C.; Aroca, R.F.; Constantino, C.J.L. Detection and quantitative analysis of carbendazim herbicide on Ag nanoparticles via surface-enhanced Raman scattering. *J. Raman Spectrosc.* 2015; 46, 1095–1101.
